# Supplementary material for: Assembled anti-adhesion polypropylene mesh with self-fixable and degradable in situ mussel-inspired hydrogel coating for abdominal wall defect repair
Source: Royal Society of Chemistry journal article supplement (doi:10.1039/c8bm00824h), 2018-01-01
Supplement: c8bm00824h1.pdf [file c8bm00824h1.pdf]

## SUPPORTING INFORMATION

### **Assembled anti-adhesion polypropylene mesh with self-fixable and degradable in situ mussel-inspired hydrogel coating for abdominal wall defect repair**

*Wanjun Hu<sup>a</sup>, Zhigang Zhang<sup>b</sup>, Shenglin Lu<sup>b</sup>, Tianzhu Zhang<sup>a,\*</sup>, Naizhen Zhou<sup>a</sup>, Pengfei Ren<sup>a</sup>, Faming Wang<sup>a</sup>, Yang Yang<sup>c</sup>, Zhenling Ji<sup>b,\*</sup>*

*a* State Key Lab of Bioelectronics, National Demonstration Center for Experimental Biomedical Engineering Education, School of Biological Science and Medical Engineering, Southeast University, Nanjing 210096, China.

*b* Department of General Surgery, Zhongda Hospital, School of Medicine, Southeast University, Nanjing 210009, China.

*c* Collage of clinical medicine, Panzhihua University, Panzhihua 617000, China.

\* Corresponding author: zhangtianzhu@seu.edu.cn (Tianzhu Zhang); zlj@vip.sina.com (Zhenling Ji)

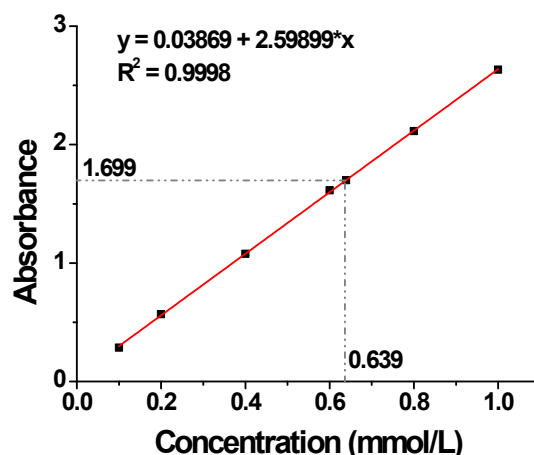

**Figure S1.** Standard curve was fitted for calculating catechol content.

The difference concentration dopamine solution (0.1, 0.2, 0.4, 0.6, 0.8 and 1.0 mmol L<sup>-1</sup>) was prepared. Then standard curve was fitted for calculating dopamine content (mole ratio). 0.1082 g OCMC-DA was weighted accurately and dissolved in 100 mL water completely. The absorbance of OCMC-DA was determined. Subsequently, the content of grafting was calculated as follow equation.

$$\text{Content (\%)} = C \times V \times 189.64 / W$$

Where  $C$ ,  $V$  and  $W$  are the concentration of catechol group, total volume, and weight of samples, respectively. The 189.64 is mole mass of dopamine.

**Table S1. Adhesion score system**

| score | Area                | Adhesion grading by resistance to lysis                                                        |
|-------|---------------------|------------------------------------------------------------------------------------------------|
| 0     | None                | No significant adhesions                                                                       |
| 1     | ≤ 25%               | Thin, narrow, and easily detachable adhesions                                                  |
| 2     | ≥ 25%,<br>and ≤ 50% | Thick adhesions limited to one area                                                            |
| 3     | ≥ 50%               | Thick and broad adhesions                                                                      |
| 4     | --                  | Thick and broad adhesions, involving the anterior or posterior abdominal wall, and the viscera |
